# Supplementary material for: Controlled destabilization of caged circularized DNA oligonucleotides predicted by replica exchange molecular dynamics simulations
Source: Royal Society of Chemistry journal article supplement (doi:10.1039/d3cp02961a), 2023-01-01
Supplement: d3cp02961a3.zip [file d3cp02961a3.zip]

AMBER99 force field BSC1 (Orozco et al. Nature methods, 13(1), pp.55-58.)

********************************************************************
* BSC0 modifications added by A. Villa to ffamber99 port in GROMACS*
* Further BSC1 modifications added by V. Lindahl.                  *
* Na+ ion parameters are taken from:                               *
* Dang 1995 (DOI: 10.1021/ja00131a018).         		   *
* The original ffamber ports were written by Eric J. Sorin,        *
* CSU Long Beach, Dept. of Chem & Biochem, and have now been       *
* integrated with the standard gromacs distribution.               *
* (Please don't blame Eric for errors we might have introduced.)   *
* For the implementation/validation, please read/cite:             * 
* Sorin & Pande (2005). Biophys. J. 88(4), 2472-2493.              *
* For related material and updates, please consult                 *
* http://chemistry.csulb.edu/ffamber/                              *
********************************************************************
